# Supplementary figures and images for: Extracellular vesicles are the primary source of blood‐borne tumour‐derived mutant KRAS DNA early in pancreatic cancer
Source: PubMed Central journal article supplement — J Extracell Vesicles. 2021 Oct 1;10(12):e12142. doi: 10.1002/jev2.12142 (PMC8485184; doi:10.1002/jev2.12142), 2021-10-01

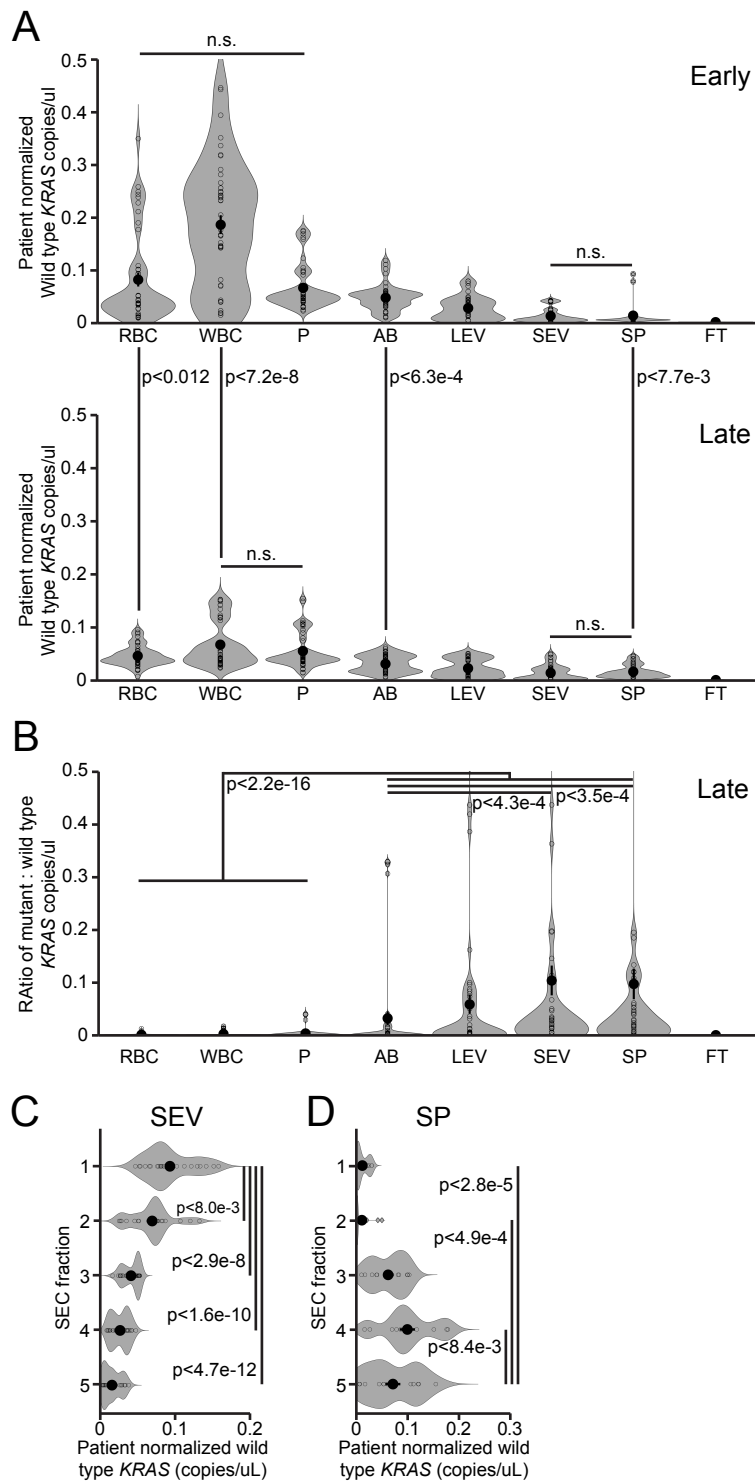

Supplement: JEV2-10-e12142-s002.pdf [file JEV2-10-e12142-s002.pdf]
